# Supplementary material for: 発達障害と子ども虐待 (特別支援教育--平等で公平な教育から個に応じた支援へ) -- (特別支援教育に関連する問題)
Source: Royal Society of Chemistry journal article supplement (doi:10.1039/d3an00770g), 2011-08-01

Supplemental Information

SI 1. Raw XRF spectra of 3 example ash samples. One sample was randomly selected from each class for presentation

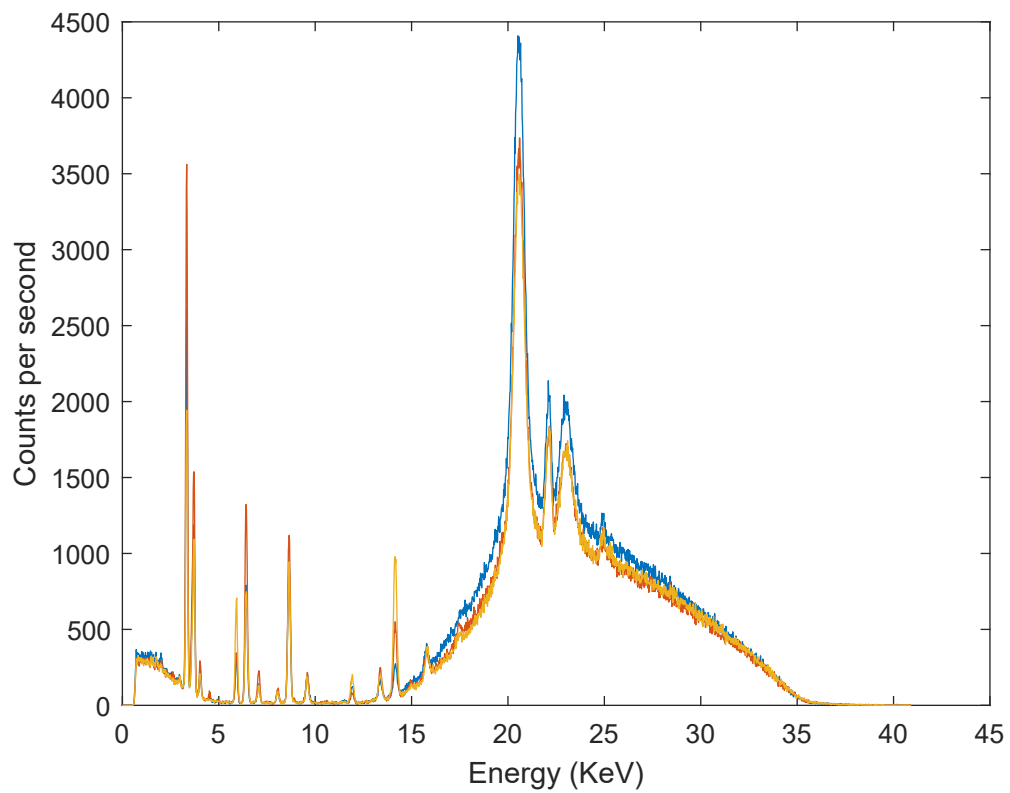

Raw XRF spectra of just the ~4 KeV to ~17 KeV range used in this study. The differences in the spectra among the three classes is more visible

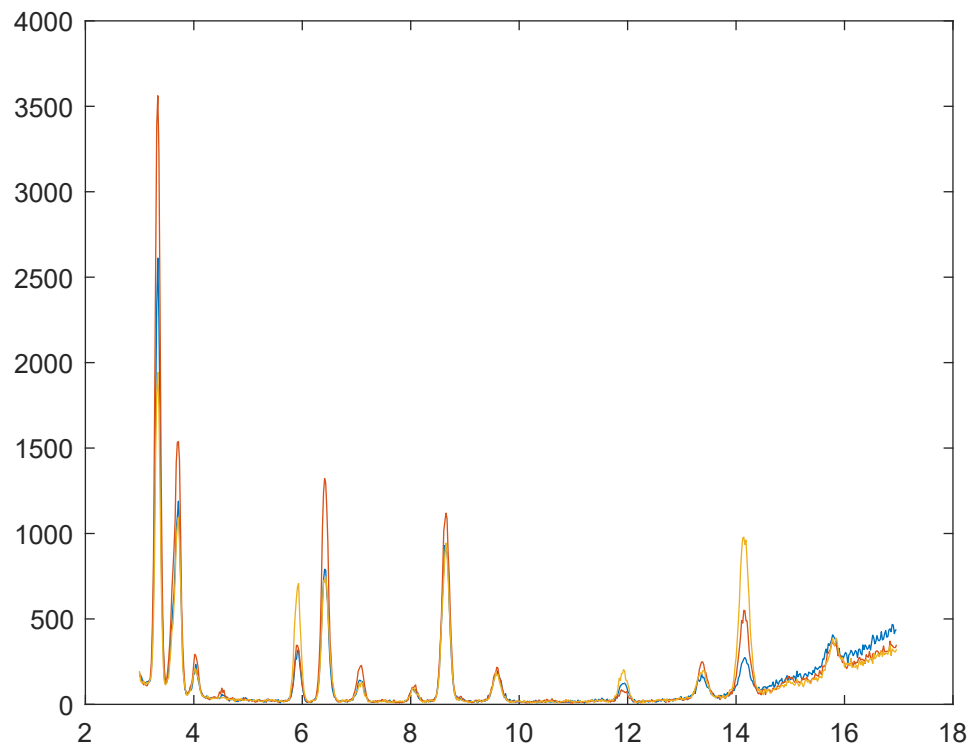

SI 2 Raw LIBS spectra of three differently colored red glasses used in this study.

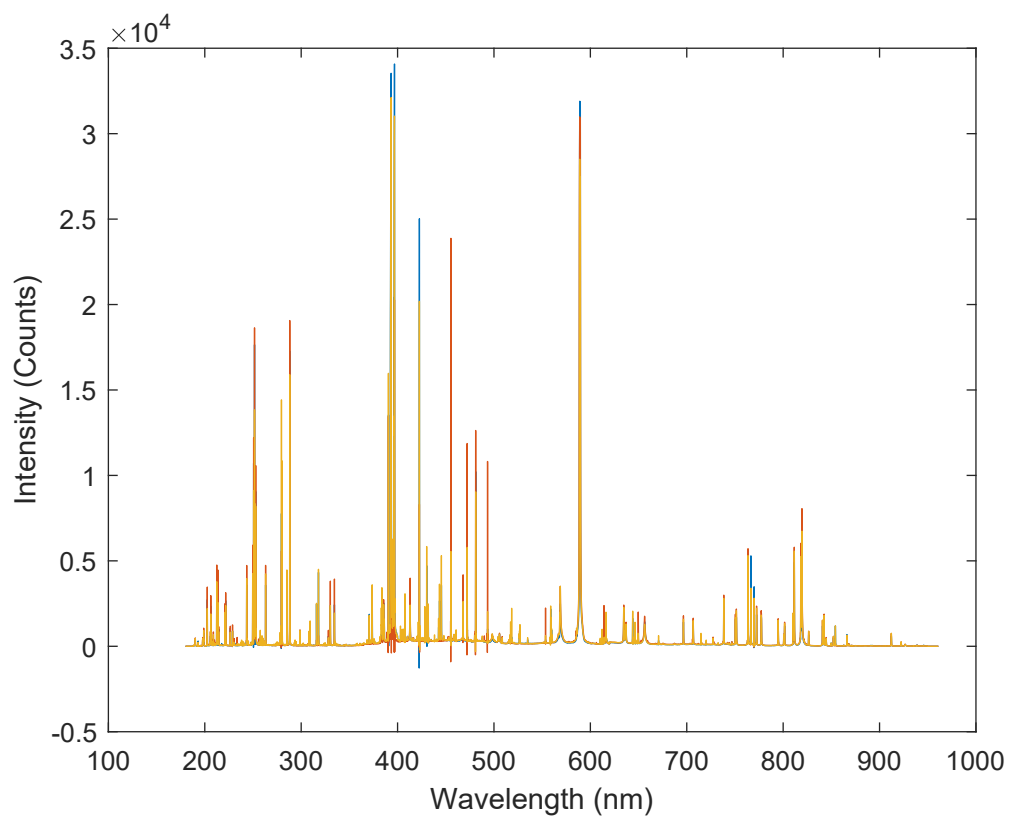

Supplement: d3an00770g1.pdf [file d3an00770g1.pdf]
